# Supplementary figures and images for: Patterns of physical activity and sedentary behaviour in preschool children
Source: Springer Nature journal article supplement (doi:10.1186/1479-5868-9-138), 2012-01-01

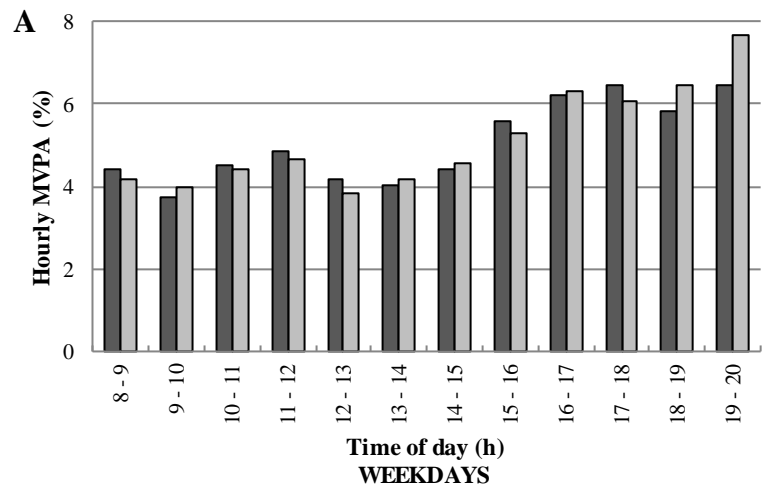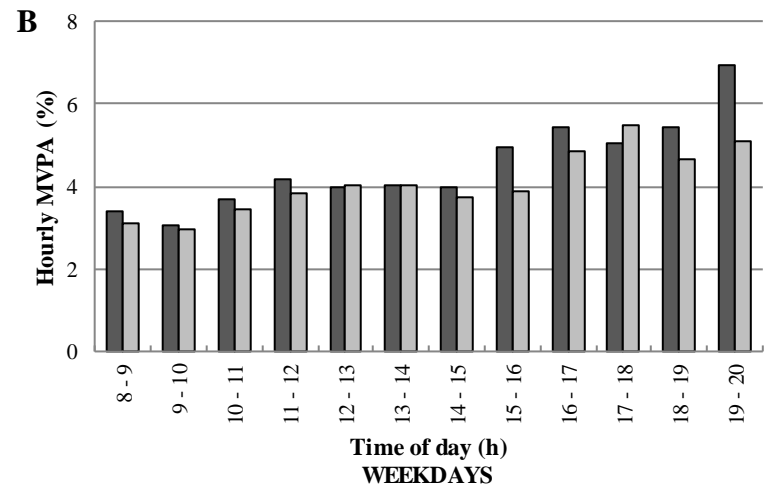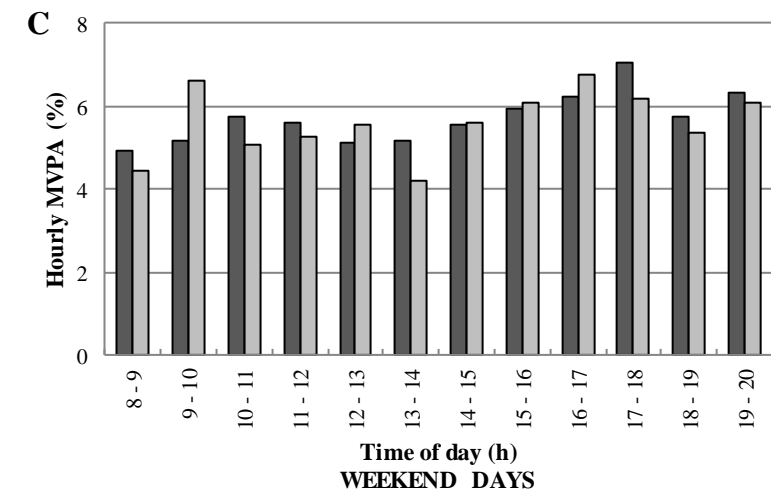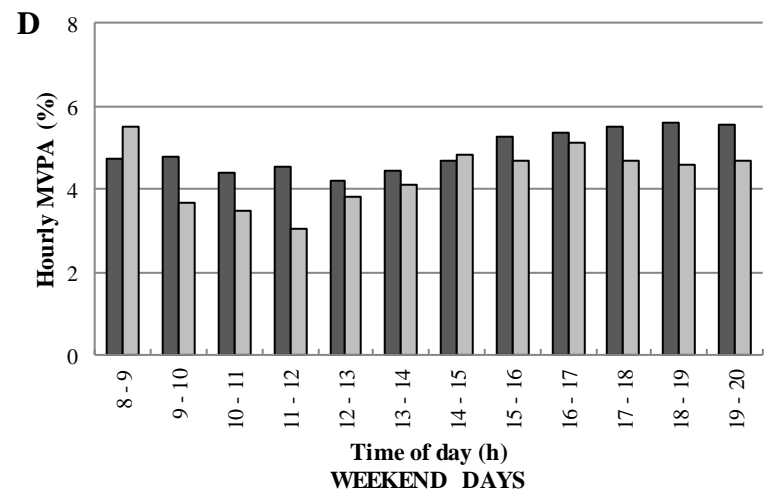

■ Healthy weight boys    □ Overweight or obese boys

■ Healthy weight girls    □ Overweight or obese girls

Supplement: 12966_2012_675_MOESM6_ESM.pdf [file 12966_2012_675_MOESM6_ESM.pdf]
